# Supplementary material for: A Non-Randomised Controlled Study of Interventions Embedded in the Curriculum to Improve Student Wellbeing at University
Source: MDPI journal article supplement (doi:10.3390/educsci12090622), 2022-09-14
Supplement: s1 [file s1]

**Table S1.** *Principal components analysis component loadings and communalities of the rotated solution for wellbeing measures from Time 1 data*

|                          | Component |       |   |
|--------------------------|-----------|-------|---|
|                          | 1         | 2     | 3 |
| Campus connectedness_Q6  | 0.78      |       |   |
| Campus connectedness_Q4  | 0.77      |       |   |
| Campus connectedness_Q9  | 0.76      |       |   |
| Campus connectedness_Q11 | 0.76      |       |   |
| Campus connectedness_Q5  | 0.76      |       |   |
| Campus connectedness_Q2  | 0.75      |       |   |
| Campus connectedness_Q3  | 0.74      |       |   |
| Campus connectedness_Q10 | 0.74      |       |   |
| Campus connectedness_Q12 | 0.71      |       |   |
| UCLA6_Q2                 | -0.65     |       |   |
| UCLA6_Q4                 | -0.61     |       |   |
| Campus connectedness_Q8  | 0.60      |       |   |
| UCLA6_Q1                 | -0.58     | -0.40 |   |
| UCLA6_Q6                 | -0.56     |       |   |
| Campus connectedness_Q7  | 0.54      | 0.40  |   |
| UCLA6_Q3                 | -0.51     |       |   |
| UCLA6_Q5                 | -0.49     | -0.41 |   |
| Flourishing_Q4           | 0.43      |       |   |
| Campus connectedness_Q1  | 0.43      |       |   |
| Flourishing_Q7           |           | 0.81  |   |
| SWEMWBS_Q6               |           | 0.75  |   |
| SWEMWBS_Q1               |           | 0.73  |   |
| SWEMWBS_Q4               |           | 0.68  |   |
| SWEMWBS_Q8               |           | 0.67  |   |
| SWEMWBS_Q2               |           | 0.66  |   |
| Flourishing_Q1           |           | 0.65  |   |
| Flourishing_Q3           |           | 0.64  |   |
| Flourishing_Q6           |           | 0.60  |   |

|                          |      |      |
|--------------------------|------|------|
| SWEMWBS_Q3               | 0.59 |      |
| Flourishing_Q5           | 0.59 |      |
| Flourishing_Q2           | 0.49 | 0.55 |
| SWEMWBS_Q7               | 0.47 | 0.52 |
| Flourishing_Q8           | 0.49 |      |
| SCSF_Q11                 |      | 0.69 |
| SCSF_Q1                  |      | 0.65 |
| SCSF_Q12                 |      | 0.65 |
| SCSF_Q9                  |      | 0.62 |
| SCSF_Q8                  |      | 0.58 |
| SCSF_Q2                  |      | 0.57 |
| SCSF_Q3                  |      | 0.54 |
| SCSF_Q5                  |      | 0.53 |
| SCSF_Q4                  |      | 0.53 |
| SCSF_Q10                 |      | 0.53 |
| SCSF_Q7                  |      | 0.53 |
| SCSF_Q6                  | 0.40 | 0.51 |
| Loadings <0.4 suppressed |      |      |

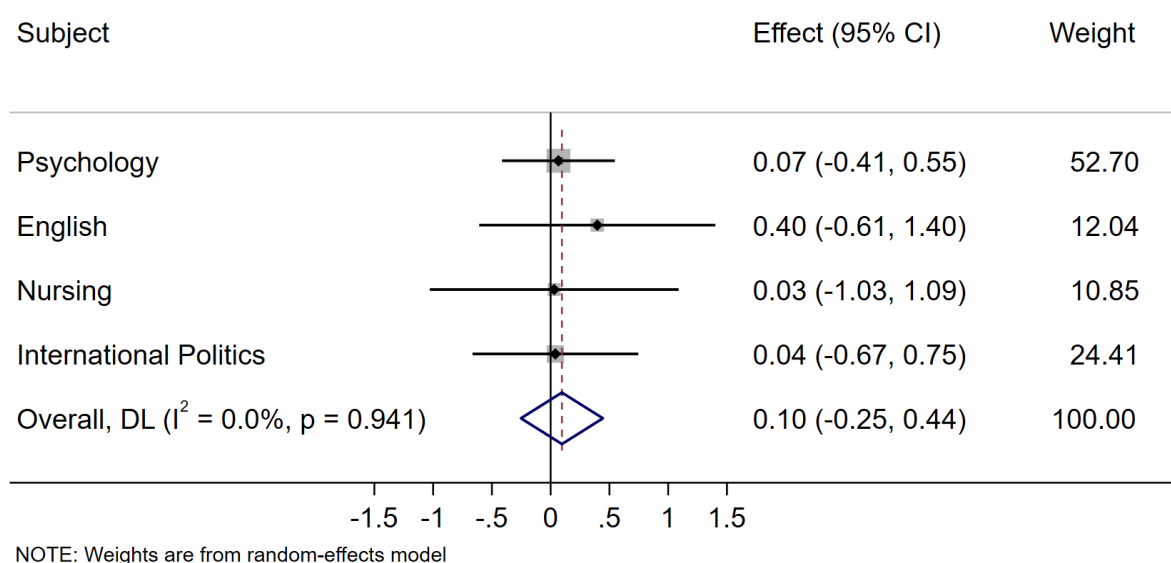

*Figure S1.* Forest plot for random-effects meta-analysis of standardised mean difference in mental wellbeing (SWEMWBS) of university students comparing intervention versus control groups.

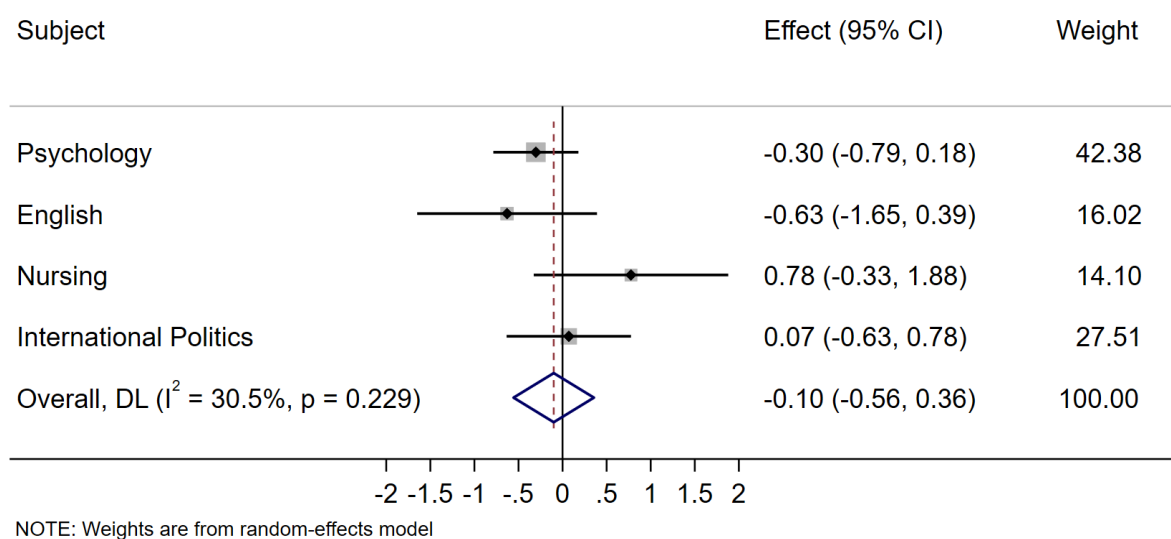

*Figure S2.* Forest plot for random-effects meta-analysis of standardised mean difference in loneliness (UCLA-6) of university students comparing intervention versus control groups.

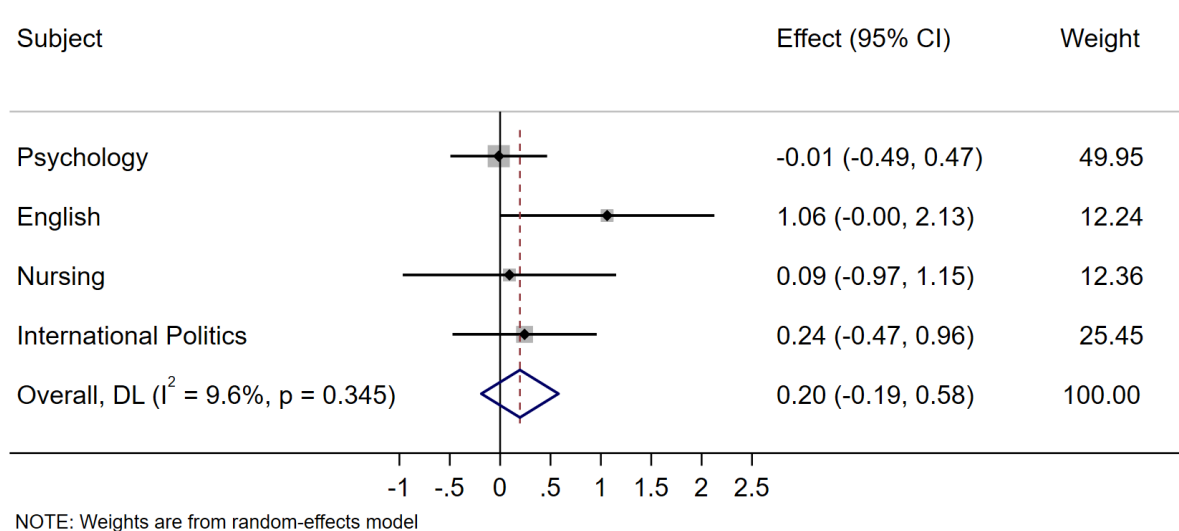

*Figure S3.* Forest plot for random-effects meta-analysis of standardised mean difference in self-compassion (SC-SF) of university students comparing intervention versus control groups.

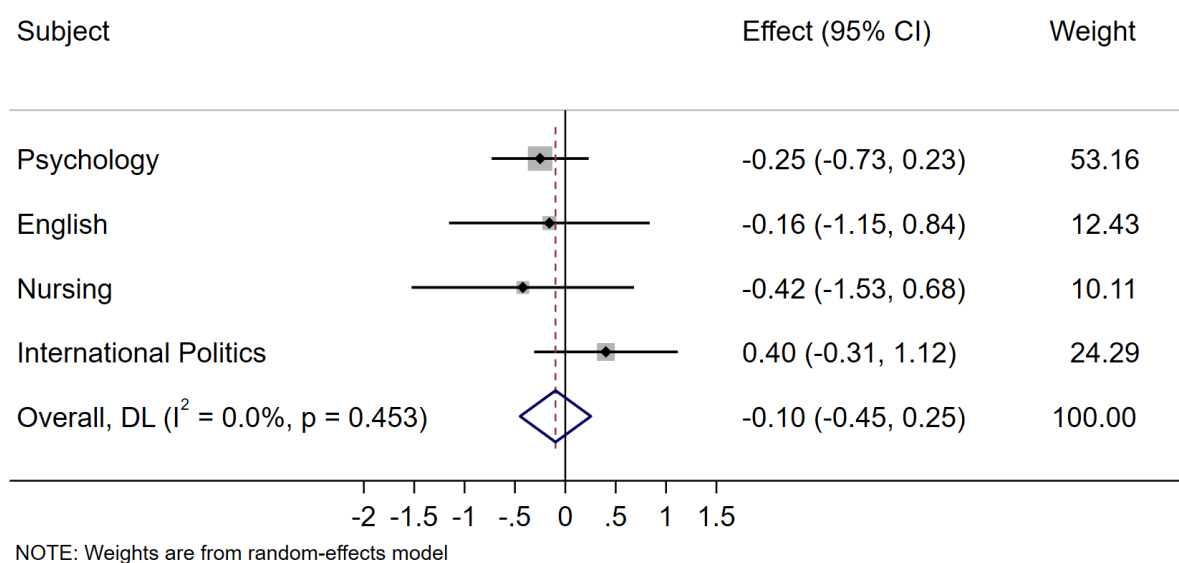

*Figure S4.* Forest plot for random-effects meta-analysis of standardised mean difference in burnout (short burnout) of university students comparing intervention versus control groups.

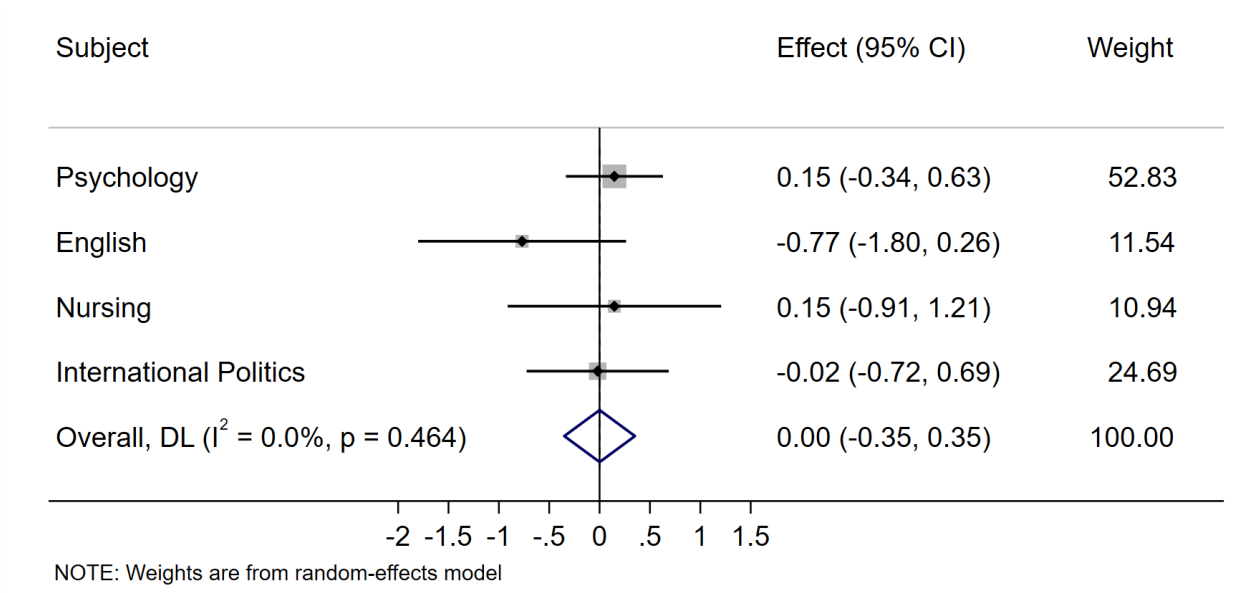

*Figure S5.* Forest plot for random-effects meta-analysis of standardised mean difference in self-esteem (SISE) of university students comparing intervention versus control groups.

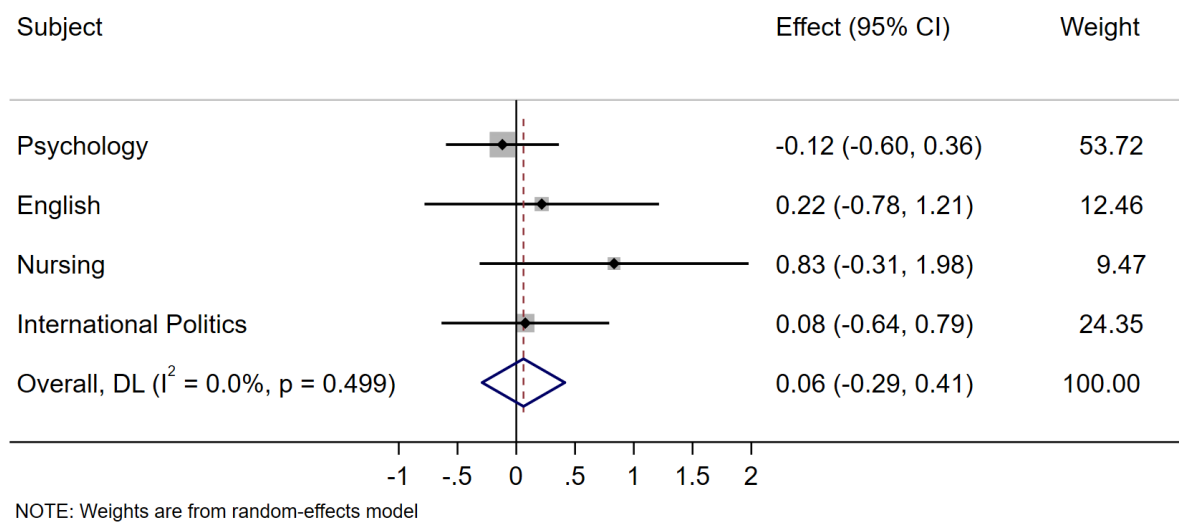

*Figure S6.* Forest plot for random-effects meta-analysis of standardised mean difference in deep learning (R-SPQ-2F) of university students comparing intervention versus control groups.

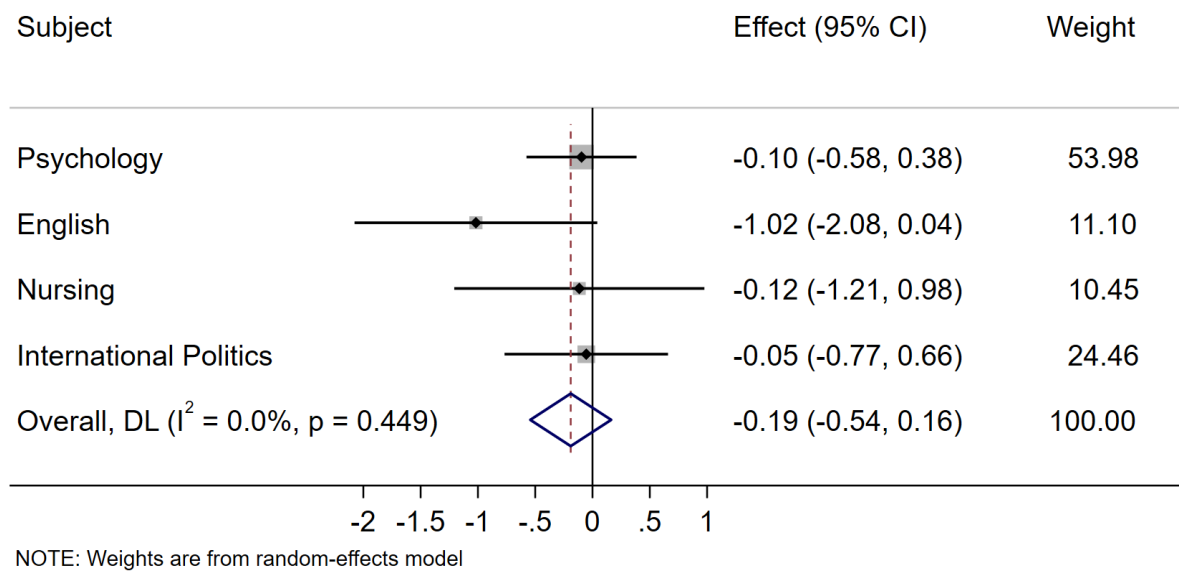

*Figure S7.* Forest plot for random-effects meta-analysis of standardised mean difference in surface learning (R-SPQ-2F) of university students comparing intervention versus control groups.
