# Supplementary material for: A Non-Randomised Controlled Study of Interventions Embedded in the Curriculum to Improve Student Wellbeing at University
Source: MDPI journal article supplement (doi:10.3390/educsci12090622), 2022-09-14
Supplement: s1 [file s1]

Archive with 1 entries (1 files):
- education-1839549-supplementary.pdf
